# Supplementary material
Source: HighWire-hosted journal article supplement (https://www.jpn.ca/highwire/filestream/90778/field_highwire_adjunct_files/0/JPN-220184-at-1.pdf)
Supplement: JPN-220184-at-1.pdf [file JPN-220184-at-1.pdf]

**Appendix 1** to Schülke R, Schmitter C, Straube B. Improving causality perception judgments in schizophrenia spectrum disorder via transcranial direct current stimulation. *J Psychiatry Neurosci* 2023. Copyright © 2023 The Author(s) or their employer(s). To receive this resource in an accessible format, please contact us at [cmaigroup@cmai.ca](mailto:cmaigroup@cmai.ca).

DOI: 10.1503/220184

*Online appendices are unedited and posted as supplied by the authors.*

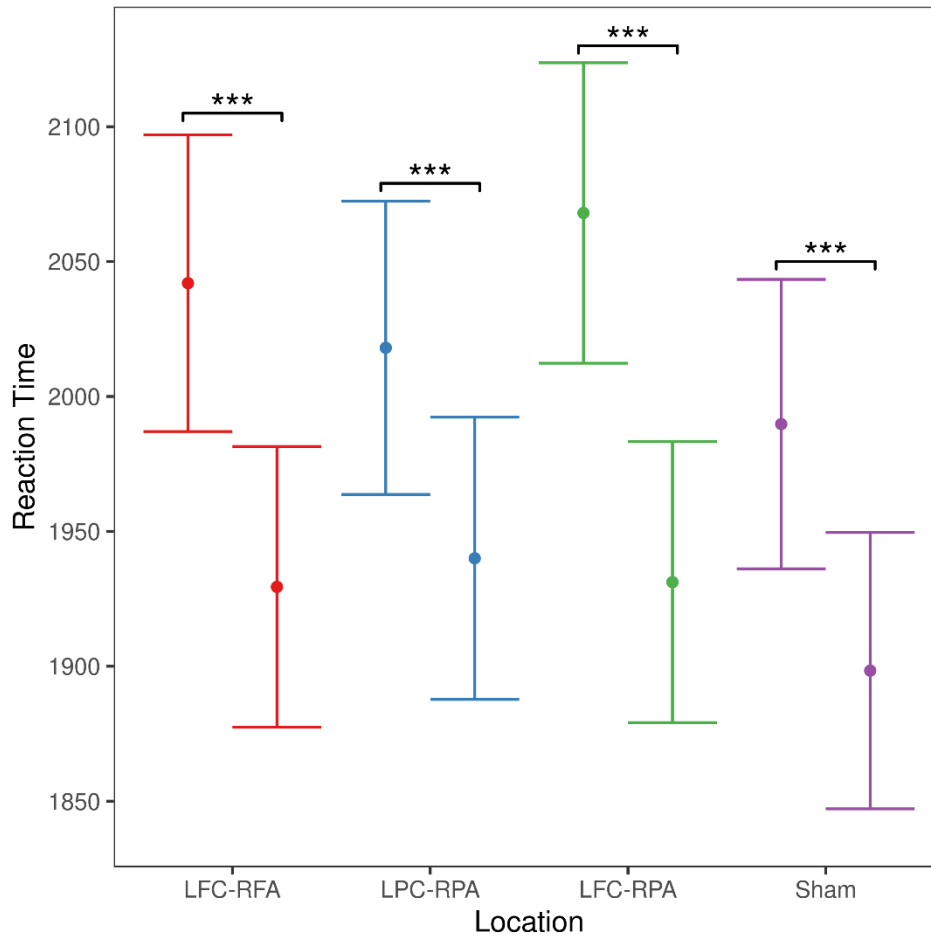

Supplementary figure 1. Reduction in reaction times after tDCS. Shown are the estimated marginal means (EMMs) of reaction times for the different stimulation locations at pre- and post-tDCS timepoints. For each condition, the left errorbar shows the EMM pre-tDCS, the right error bar shows the EMM post-tDCS. FDR-adjusted p-values were computed using the Benjamini-Hochberg method, to correct for performing 4 tests. LFC-RFA: left frontal cathodal, right frontal anodal tDCS; LFC-RPA: left frontal cathodal, right frontal anodal tDCS; LPC-RPA: left parietal cathodal, right parietal anodal tDCS. \*\*\*  $p_{adj} < .001$

**Appendix 1** to Schülke R, Schmitter C, Straube B. Improving causality perception judgments in schizophrenia spectrum disorder via transcranial direct current stimulation. *J Psychiatry Neurosci* 2023. Copyright © 2023 The Author(s) or their employer(s). To receive this resource in an accessible format, please contact us at [cmaigroup@cmai.ca](mailto:cmaigroup@cmai.ca).

DOI: 10.1503/220184

*Online appendices are unedited and posted as supplied by the authors.*

| <b>Class</b>            | <b>Number of different drugs/patient</b> |          |          |          |
|-------------------------|------------------------------------------|----------|----------|----------|
|                         | <b>0</b>                                 | <b>1</b> | <b>2</b> | <b>3</b> |
| Antipsychotics          | 2                                        | 6        | 8        | 2        |
| Atypical Antipsychotics | 2                                        | 7        | 8        | 1        |
| Typical Antipsychotics  | 16                                       | 1        | 1        | 0        |
| Lithium                 | 17                                       | 1        | 0        | 0        |
| Anticonvulsants         | 15                                       | 3        | 0        | 0        |
| Benzodiazepines         | 0                                        | 0        | 0        | 0        |
| Antidepressants         | 11                                       | 5        | 2        | 0        |

Supplementary Table 1. Sample medication. Shown are the numbers of different drugs prescribed per patient, for the different classes of psychotropic drugs (e.g., eight patients were prescribed exactly two atypical antipsychotic drugs).

**Appendix 1** to Schülke R, Schmitter C, Straube B. Improving causality perception judgments in schizophrenia spectrum disorder via transcranial direct current stimulation. *J Psychiatry Neurosci* 2023. Copyright © 2023 The Author(s) or their employer(s). To receive this resource in an accessible format, please contact us at [cmaigroup@cmai.ca](mailto:cmaigroup@cmai.ca).

DOI: 10.1503/220184

*Online appendices are unedited and posted as supplied by the authors.*

***Between-location Differences of Causality Judgments by Angle and Timepoint***

| <b>Contrast</b>     | <b>Angle Timepoint</b> | <b>Odds Ratio</b> | <b>SE</b> | <b>z Ratio</b> | <b>p<sub>adj</sub></b> | <b>p<sub>unadj</sub></b> |
|---------------------|------------------------|-------------------|-----------|----------------|------------------------|--------------------------|
| LFC-RPA vs. LPC-RPA | 45.0 post              | 3.726             | 0.918     | 5.337          | <b>&lt;.001</b>        | <.001                    |
| LFC-RFA vs. LFC-RPA | 45.0 post              | 2.547             | 0.638     | 3.735          | <b>0.008</b>           | <.001                    |
| LFC-RFA vs. LFC-RPA | 30.0 post              | 2.130             | 0.475     | 3.390          | <b>0.013</b>           | 0.001                    |
| LFC-RFA vs. Sham    | 30.0 post              | 2.136             | 0.482     | 3.359          | <b>0.013</b>           | 0.001                    |
| LFC-RPA vs. Sham    | 45.0 post              | 0.427             | 0.106     | -3.420         | <b>0.013</b>           | 0.001                    |
| LFC-RFA vs. LPC-RPA | 7.5 pre                | 2.147             | 0.532     | 3.082          | <b>0.027</b>           | 0.002                    |
| LFC-RFA vs. LFC-RPA | 15.0 pre               | 2.099             | 0.509     | 3.057          | <b>0.027</b>           | 0.002                    |
| LFC-RPA vs. LPC-RPA | 7.5 post               | 0.482             | 0.119     | -2.946         | <b>0.031</b>           | 0.003                    |
| LFC-RPA vs. LPC-RPA | 60.0 post              | 2.329             | 0.670     | 2.937          | <b>0.031</b>           | 0.003                    |
| LFC-RFA vs. LFC-RPA | 7.5 pre                | 1.984             | 0.486     | 2.796          | <b>0.036</b>           | 0.005                    |
| LPC-RPA vs. Sham    | 7.5 post               | 0.490             | 0.122     | -2.859         | <b>0.036</b>           | 0.004                    |
| LPC-RPA vs. Sham    | 60.0 post              | 2.211             | 0.625     | 2.810          | <b>0.036</b>           | 0.005                    |
| LFC-RFA vs. LPC-RPA | 7.5 post               | 1.929             | 0.478     | 2.651          | 0.052                  | 0.008                    |
| LFC-RFA vs. LPC-RPA | 0.0 pre                | 1.932             | 0.502     | 2.535          | 0.067                  | 0.011                    |
| LFC-RFA vs. LFC-RPA | 0.0 pre                | 1.831             | 0.476     | 2.326          | 0.112                  | 0.020                    |
| LFC-RFA vs. LPC-RPA | 0.0 post               | 1.840             | 0.489     | 2.291          | 0.115                  | 0.022                    |
| LFC-RFA vs. LPC-RPA | 15.0 pre               | 1.714             | 0.414     | 2.234          | 0.122                  | 0.025                    |
| LFC-RPA vs. LPC-RPA | 30.0 post              | 1.639             | 0.365     | 2.218          | 0.122                  | 0.027                    |
| LPC-RPA vs. Sham    | 30.0 post              | 1.643             | 0.371     | 2.202          | 0.122                  | 0.028                    |
| LFC-RPA vs. LPC-RPA | 0.0 post               | 0.562             | 0.149     | -2.167         | 0.127                  | 0.030                    |
| LPC-RPA vs. Sham    | 45.0 post              | 1.593             | 0.352     | 2.103          | 0.142                  | 0.035                    |
| LFC-RPA vs. Sham    | 30.0 pre               | 0.629             | 0.144     | -2.023         | 0.162                  | 0.043                    |
| LFC-RFA vs. LPC-RPA | 60.0 post              | 0.574             | 0.158     | -2.012         | 0.162                  | 0.044                    |
| LFC-RFA vs. Sham    | 15.0 pre               | 1.599             | 0.386     | 1.944          | 0.174                  | 0.052                    |
| LFC-RFA vs. LFC-RPA | 30.0 pre               | 1.563             | 0.355     | 1.962          | 0.174                  | 0.050                    |
| LFC-RFA vs. Sham    | 45.0 pre               | 0.664             | 0.149     | -1.819         | 0.223                  | 0.069                    |
| LPC-RPA vs. Sham    | 7.5 pre                | 0.648             | 0.162     | -1.742         | 0.254                  | 0.082                    |
| LFC-RPA vs. Sham    | 45.0 pre               | 0.676             | 0.154     | -1.721         | 0.255                  | 0.085                    |
| LFC-RFA vs. LPC-RPA | 45.0 post              | 0.684             | 0.152     | -1.705         | 0.255                  | 0.088                    |
| LFC-RFA vs. LFC-RPA | 60.0 pre               | 0.645             | 0.169     | -1.672         | 0.265                  | 0.095                    |
| LFC-RPA vs. Sham    | 7.5 pre                | 0.701             | 0.173     | -1.439         | 0.374                  | 0.150                    |
| LPC-RPA vs. Sham    | 22.5 pre               | 0.714             | 0.168     | -1.434         | 0.374                  | 0.152                    |
| LFC-RFA vs. LPC-RPA | 22.5 post              | 1.415             | 0.332     | 1.480          | 0.374                  | 0.139                    |

**Appendix 1** to Schülke R, Schmitter C, Straube B. Improving causality perception judgments in schizophrenia spectrum disorder via transcranial direct current stimulation. *J Psychiatry Neurosci* 2023. Copyright © 2023 The Author(s) or their employer(s).

To receive this resource in an accessible format, please contact us at [cmaigroup@cmai.ca](mailto:cmaigroup@cmai.ca).

DOI: 10.1503/220184

*Online appendices are unedited and posted as supplied by the authors.*

| <b>Contrast</b>     | <b>Angle Timepoint</b> | <b>Odds Ratio</b> | <b>SE</b> | <b>z Ratio</b> | <b>p<sub>adj</sub></b> | <b>p<sub>unadj</sub></b> |
|---------------------|------------------------|-------------------|-----------|----------------|------------------------|--------------------------|
| LPC-RPA vs. Sham    | 30.0 pre               | 0.723             | 0.163     | -1.443         | 0.374                  | 0.149                    |
| LPC-RPA vs. Sham    | 15.0 post              | 0.712             | 0.173     | -1.400         | 0.388                  | 0.161                    |
| LFC-RFA vs. LPC-RPA | 30.0 pre               | 1.359             | 0.303     | 1.376          | 0.394                  | 0.169                    |
| LFC-RFA vs. Sham    | 7.5 pre                | 1.391             | 0.344     | 1.331          | 0.416                  | 0.183                    |
| LFC-RFA vs. Sham    | 22.5 post              | 1.358             | 0.317     | 1.309          | 0.421                  | 0.190                    |
| LPC-RPA vs. Sham    | 0.0 pre                | 0.719             | 0.186     | -1.274         | 0.437                  | 0.203                    |
| LFC-RFA vs. Sham    | 0.0 pre                | 1.390             | 0.368     | 1.243          | 0.438                  | 0.214                    |
| LFC-RFA vs. LFC-RPA | 22.5 post              | 1.338             | 0.310     | 1.255          | 0.438                  | 0.209                    |
| LPC-RPA vs. Sham    | 0.0 post               | 0.728             | 0.193     | -1.198         | 0.457                  | 0.231                    |
| LFC-RFA vs. LPC-RPA | 30.0 post              | 1.300             | 0.286     | 1.190          | 0.457                  | 0.234                    |
| LFC-RPA vs. Sham    | 60.0 pre               | 1.359             | 0.358     | 1.165          | 0.466                  | 0.244                    |
| LFC-RFA vs. Sham    | 0.0 post               | 1.339             | 0.362     | 1.082          | 0.478                  | 0.279                    |
| LFC-RPA vs. Sham    | 15.0 pre               | 0.762             | 0.186     | -1.117         | 0.478                  | 0.264                    |
| LFC-RFA vs. LPC-RPA | 15.0 post              | 1.300             | 0.314     | 1.089          | 0.478                  | 0.276                    |
| LFC-RFA vs. LPC-RPA | 22.5 pre               | 1.289             | 0.301     | 1.087          | 0.478                  | 0.277                    |
| LFC-RPA vs. Sham    | 22.5 pre               | 0.772             | 0.183     | -1.091         | 0.478                  | 0.275                    |
| LFC-RPA vs. Sham    | 0.0 pre                | 0.759             | 0.197     | -1.064         | 0.483                  | 0.287                    |
| LFC-RPA vs. Sham    | 0.0 post               | 1.295             | 0.349     | 0.958          | 0.528                  | 0.338                    |
| LFC-RPA vs. Sham    | 15.0 post              | 0.785             | 0.192     | -0.990         | 0.528                  | 0.322                    |
| LPC-RPA vs. Sham    | 45.0 pre               | 0.806             | 0.181     | -0.960         | 0.528                  | 0.337                    |
| LFC-RFA vs. LFC-RPA | 60.0 post              | 1.336             | 0.406     | 0.955          | 0.528                  | 0.339                    |
| LFC-RFA vs. LPC-RPA | 60.0 pre               | 0.784             | 0.208     | -0.917         | 0.548                  | 0.359                    |
| LFC-RPA vs. LPC-RPA | 15.0 pre               | 1.224             | 0.298     | 0.831          | 0.598                  | 0.406                    |
| LFC-RFA vs. LPC-RPA | 45.0 pre               | 0.824             | 0.190     | -0.840         | 0.598                  | 0.401                    |
| LFC-RFA vs. Sham    | 60.0 post              | 1.269             | 0.379     | 0.798          | 0.615                  | 0.425                    |
| LFC-RFA vs. LFC-RPA | 22.5 pre               | 1.193             | 0.282     | 0.747          | 0.627                  | 0.455                    |
| LFC-RPA vs. LPC-RPA | 45.0 pre               | 1.191             | 0.276     | 0.754          | 0.627                  | 0.451                    |
| LFC-RPA vs. LPC-RPA | 60.0 pre               | 0.823             | 0.211     | -0.761         | 0.627                  | 0.447                    |
| LFC-RFA vs. LFC-RPA | 15.0 post              | 1.179             | 0.286     | 0.678          | 0.674                  | 0.498                    |
| LFC-RPA vs. LPC-RPA | 30.0 pre               | 1.150             | 0.263     | 0.612          | 0.721                  | 0.541                    |
| LFC-RFA vs. Sham    | 60.0 pre               | 0.877             | 0.239     | -0.481         | 0.828                  | 0.631                    |
| LPC-RPA vs. Sham    | 60.0 pre               | 1.119             | 0.298     | 0.421          | 0.871                  | 0.674                    |
| LFC-RPA vs. LPC-RPA | 15.0 post              | 0.906             | 0.220     | -0.405         | 0.873                  | 0.686                    |
| LFC-RFA vs. Sham    | 45.0 post              | 1.089             | 0.246     | 0.376          | 0.886                  | 0.707                    |

**Appendix 1** to Schülke R, Schmitter C, Straube B. Improving causality perception judgments in schizophrenia spectrum disorder via transcranial direct current stimulation. *J Psychiatry Neurosci* 2023. Copyright © 2023 The Author(s) or their employer(s). To receive this resource in an accessible format, please contact us at [cmaigroup@cmai.ca](mailto:cmaigroup@cmai.ca).

DOI: 10.1503/220184

*Online appendices are unedited and posted as supplied by the authors.*

| <b>Contrast</b>     | <b>Angle Timepoint</b> | <b>Odds Ratio</b> | <b>SE</b> | <b>z Ratio</b> | <b>p<sub>adj</sub></b> | <b>p<sub>unadj</sub></b> |
|---------------------|------------------------|-------------------|-----------|----------------|------------------------|--------------------------|
| LFC-RPA vs. LPC-RPA | 7.5 pre                | 0.924             | 0.227     | -0.321         | 0.887                  | 0.748                    |
| LFC-RFA vs. Sham    | 15.0 post              | 0.926             | 0.224     | -0.319         | 0.887                  | 0.750                    |
| LFC-RFA vs. Sham    | 22.5 pre               | 0.921             | 0.213     | -0.356         | 0.887                  | 0.722                    |
| LFC-RPA vs. LPC-RPA | 22.5 pre               | 0.925             | 0.221     | -0.325         | 0.887                  | 0.745                    |
| LFC-RFA vs. LFC-RPA | 7.5 post               | 0.929             | 0.231     | -0.296         | 0.890                  | 0.767                    |
| LPC-RPA vs. Sham    | 15.0 pre               | 0.933             | 0.226     | -0.288         | 0.890                  | 0.774                    |
| LFC-RPA vs. LPC-RPA | 0.0 pre                | 0.948             | 0.240     | -0.213         | 0.919                  | 0.831                    |
| LFC-RFA vs. Sham    | 7.5 post               | 0.945             | 0.237     | -0.225         | 0.919                  | 0.822                    |
| LFC-RPA vs. LPC-RPA | 22.5 post              | 0.946             | 0.222     | -0.239         | 0.919                  | 0.811                    |
| LPC-RPA vs. Sham    | 22.5 post              | 0.960             | 0.227     | -0.174         | 0.933                  | 0.862                    |
| LFC-RPA vs. Sham    | 60.0 post              | 0.950             | 0.293     | -0.168         | 0.933                  | 0.867                    |
| LFC-RFA vs. LFC-RPA | 0.0 post               | 1.035             | 0.279     | 0.126          | 0.956                  | 0.899                    |
| LFC-RPA vs. Sham    | 7.5 post               | 1.017             | 0.255     | 0.069          | 0.961                  | 0.945                    |
| LFC-RPA vs. Sham    | 22.5 post              | 1.015             | 0.237     | 0.063          | 0.961                  | 0.950                    |
| LFC-RFA vs. Sham    | 30.0 pre               | 0.982             | 0.220     | -0.080         | 0.961                  | 0.937                    |
| LFC-RFA vs. LFC-RPA | 45.0 pre               | 0.982             | 0.228     | -0.079         | 0.961                  | 0.937                    |
| LFC-RPA vs. Sham    | 30.0 post              | 1.002             | 0.228     | 0.011          | 0.992                  | 0.992                    |

Supplementary table 2. Pairwise comparisons among estimated marginal means of causality judgments between tDCS locations, for each angle, at pre- and post-tDCS timepoints. Ordered by statistical significance. FDR-adjusted p-values were computed using the Benjamini-Hochberg method, to correct for performing 84 tests. LFC-RFA: left frontal cathodal, right frontal anodal tDCS; LFC-RPA: left frontal cathodal, right frontal anodal tDCS; LPC-RPA: left parietal cathodal, right parietal anodal tDCS.

**Appendix 1** to Schülke R, Schmitter C, Straube B. Improving causality perception judgments in schizophrenia spectrum disorder via transcranial direct current stimulation. *J Psychiatry Neurosci* 2023. Copyright © 2023 The Author(s) or their employer(s). To receive this resource in an accessible format, please contact us at [cmaigroup@cmai.ca](mailto:cmaigroup@cmai.ca).

DOI: 10.1503/220184

*Online appendices are unedited and posted as supplied by the authors.*

***Tests of Model Effects for Generalized Linear Mixed Model  
of Reaction Times***

| <b>Effect</b>                        | <b><math>\chi^2</math></b> | <b>df</b> | <b>p</b>        |
|--------------------------------------|----------------------------|-----------|-----------------|
| (Intercept)                          | 80,063.933                 | 1         | <b>&lt;.001</b> |
| Timepoint                            | 115.673                    | 1         | <b>&lt;.001</b> |
| Location                             | 60.311                     | 3         | <b>&lt;.001</b> |
| Angle                                | 0.615                      | 1         | 0.433           |
| Delay                                | 55.734                     | 1         | <b>&lt;.001</b> |
| Timepoint × Location                 | 16.897                     | 3         | <b>0.001</b>    |
| Timepoint × Angle                    | 0.021                      | 1         | 0.885           |
| Location × Angle                     | 1.671                      | 3         | 0.643           |
| Timepoint × Delay                    | 3.714                      | 1         | 0.054           |
| Location × Delay                     | 0.292                      | 3         | 0.962           |
| Angle × Delay                        | 4.753                      | 1         | <b>0.029</b>    |
| Timepoint × Location × Angle         | 0.622                      | 3         | 0.891           |
| Timepoint × Location × Delay         | 3.361                      | 3         | 0.339           |
| Timepoint × Angle × Delay            | 0.389                      | 1         | 0.533           |
| Location × Angle × Delay             | 2.482                      | 3         | 0.479           |
| Timepoint × Location × Angle × Delay | 0.659                      | 3         | 0.883           |

Supplementary Table 3. Shown are the results of Wald tests for the fixed effects and interactions of the generalized linear mixed model for reaction times. In addition to the fixed effects, the random effect of participant was included in the model.

**Appendix 1** to Schülke R, Schmitter C, Straube B. Improving causality perception judgments in schizophrenia spectrum disorder via transcranial direct current stimulation. *J Psychiatry Neurosci* 2023. Copyright © 2023 The Author(s) or their employer(s). To receive this resource in an accessible format, please contact us at [cmaigroup@cmai.ca](mailto:cmaigroup@cmai.ca).

DOI: 10.1503/220184

*Online appendices are unedited and posted as supplied by the authors.*

***Reduction in Reaction Times From Pre- to Post-tDCS***

| <b>Location</b> | <b>RT Reduction (ms)</b> | <b>Ratio</b> | <b>SE</b> | <b>z Ratio</b> | <b>p<sub>adj</sub></b> | <b>p<sub>unadj</sub></b> |
|-----------------|--------------------------|--------------|-----------|----------------|------------------------|--------------------------|
| LFC-RFA         | 112.574                  | 1.058        | 0.006     | 10.755         | <b>&lt;.001</b>        | <.001                    |
| LPC-RPA         | 78.027                   | 1.040        | 0.006     | 7.448          | <b>&lt;.001</b>        | <.001                    |
| LFC-RPA         | 136.818                  | 1.071        | 0.006     | 12.994         | <b>&lt;.001</b>        | <.001                    |
| Sham            | 91.383                   | 1.048        | 0.006     | 8.717          | <b>&lt;.001</b>        | <.001                    |

Supplementary Table 4. Pairwise comparisons among estimated marginal means of pre- and post-tDCS reaction times, for the different tDCS locations. FDR-adjusted p-values were computed using the Benjamini-Hochberg method, to correct for performing 4 tests. LFC-RFA: left frontal cathodal, right frontal anodal tDCS; LFC-RPA: left frontal cathodal, right frontal anodal tDCS; LPC-RPA: left parietal cathodal, right parietal anodal tDCS.
